# Supplementary material
Source: Springer Nature journal article supplement (https://www.springermedizin.de/resource/supplementary/12913_2007_577_MOESM4_ESM.pdf/9535904)
Supplement: MOESM4 [file 9535904]

Table 3: key features of the intervention for quantitative process evaluation

|                                    |                                                                                                                                                                                                               |
|------------------------------------|---------------------------------------------------------------------------------------------------------------------------------------------------------------------------------------------------------------|
| <b>1<sup>st</sup> consultation</b> | Nurse explains the risk to the patient by means of the risk communication tool.                                                                                                                               |
|                                    | Nurse hands over the risk communication tool.                                                                                                                                                                 |
|                                    | Nurse hands over decision aid booklet + risk communication tool (to consider at home).                                                                                                                        |
| <b>2<sup>nd</sup> consultation</b> | Patient shows up for second consultation. If patients cancel, they are asked for the reason                                                                                                                   |
|                                    | Nurse uses motivational interviewing; sets agenda with the help of an agenda-setting chart, establishes importance and confidence, explores importance and builds confidence by asking the patient questions. |
|                                    | Which options for risk reduction were discussed during the consultation?                                                                                                                                      |
|                                    | Nurse guides the patient in formulating the main personal goal for lifestyle change (if applicable).                                                                                                          |
|                                    | When medication is prescribed: has the nurse consulted the GP?                                                                                                                                                |
|                                    | Which other health education materials were used during the consultation?                                                                                                                                     |
| <b>Telephone call</b>              | The telephone call takes place. If patients cancel, they are asked for the reason                                                                                                                             |
|                                    | Nurse uses motivational interviewing; sets agenda with the help of an agenda-setting chart; establishes importance and confidence, explores importance and builds confidence by                               |

|                    |                                                                                                      |
|--------------------|------------------------------------------------------------------------------------------------------|
|                    | asking the patient questions.                                                                        |
|                    | Which options for risk reduction were discussed during the telephone call?                           |
|                    | Nurse guides the patient in formulating the main personal goal for lifestyle change (if applicable). |
| <b>Extra items</b> | Time needed per patient contact.                                                                     |
|                    | Time needed to discuss patients with GP.                                                             |
|                    | Appointment for follow-up consultation after the telephone call, if necessary.                       |
